# Supplementary material
Source: PubMed Central journal article supplement (PMC6133760)
Supplement: NIHMS963528-supplement-3.pdf [file NIHMS963528-supplement-3.pdf]

**Supplementary Table 1.** Unadjusted and adjusted smoking frequencies in myositis phenotypes

|                        | Unadjusted smoking frequency |             |                            |          |                             |          | Adjusted smoking frequency |             |                            |          |                             |             |
|------------------------|------------------------------|-------------|----------------------------|----------|-----------------------------|----------|----------------------------|-------------|----------------------------|----------|-----------------------------|-------------|
|                        | Caucasians<br>(n=330)        |             | African-American<br>(n=99) |          | Total Population<br>(n=465) |          | Caucasians<br>(n=330)      |             | African-American<br>(n=99) |          | Total Population<br>(n=465) |             |
|                        | N<br>(+/total)               | Freq<br>(%) | N<br>(+/total)             | Freq (%) | N<br>(+/total)              | Freq (%) | N<br>(+/total)             | Freq<br>(%) | N<br>(+/total)             | Freq (%) | N<br>(+/total)              | Freq<br>(%) |
| Diagnosis              |                              |             |                            |          |                             |          |                            |             |                            |          |                             |             |
| Dermatomyositis        | 47/149                       | 32%         | 5/28                       | 18%      | 55/193                      | 28%      | 51.9/149                   | 35%         | 5.5/28                     | 20%      | 49.7/193                    | 26%         |
| Polymyositis           | 92/176                       | 52%         | 24/71                      | 34%      | 124/267                     | 46%      | 96.1/176                   | 55%         | 26.1/71                    | 37%      | 117.3/267                   | 44%         |
| ILD-negative           | 82/214                       | 38%         | 15/51                      | 29%      | 101/286                     | 35%      | 90.7/214                   | 42%         | 17.2/51                    | 34%      | 95.5/286                    | 33%         |
| ILD-positive           | 54/103                       | 52%         | 13/43                      | 30%      | 74/161                      | 46%      | 55.9/103                   | 54%         | 13.9/41                    | 32%      | 69.6/161                    | 43%         |
| MSA-negative           | 51/122                       | 42%         | 9/28                       | 32%      | 64/166                      | 39%      | 55.4/122                   | 45%         | 10.7/28                    | 38%      | 62.6/166                    | 38%         |
| MSA-positive           | 60/144                       | 42%         | 12/43                      | 28%      | 76/195                      | 39%      | 63.7/144                   | 44%         | 14.2/43                    | 33%      | 73.7/195                    | 38%         |
| ASA-negative           | 69/183                       | 38%         | 14/45                      | 31%      | 89/248                      | 36%      | 72.5/183                   | 40%         | 17.2/45                    | 38%      | 85.6/248                    | 35%         |
| ASA-positive           | 42/83                        | 51%         | 7/26                       | 27%      | 51/113                      | 45%      | 46.4/83                    | 56%         | 7.7/26                     | 30%      | 51.6/113                    | 46%         |
| Anti-Jo-1-negative     | 75/197                       | 38%         | 15/54                      | 28%      | 96/271                      | 35%      | 79.2/197                   | 40%         | 19.2/54                    | 36%      | 93.7/271                    | 35%         |
| Anti-Jo-1-positive     | 35/68                        | 51%         | 6/17                       | 35%      | 43/89                       | 48%      | 38.4/68                    | 57%         | 5.6/17                     | 33%      | 42.2/89                     | 47%         |
| Anti-PL-7-negative     | 105/255                      | 41%         | 20/69                      | 29%      | 133/348                     | 38%      | 112.7/255                  | 44%         | 23.5/69                    | 34%      | 130.5/348                   | 37%         |
| Anti-PL-7-positive     | 3/6                          | 50%         | 1/2                        | 50%      | 4/8                         | 50%      | 3.5/6                      | 58%         | 1.2/2                      | 62%      | 4.3/8                       | 54%         |
| Anti-PL-12-negative    | 106/259                      | 41%         | 21/66                      | 32%      | 135/349                     | 39%      | 114.1/259                  | 44%         | 23.8/66                    | 36%      | 131.8/349                   | 38%         |
| Anti-PL-12-positive    | 2/2                          | 100%        | 0/5                        | 0%       | 2/7                         | 29%      | 2/2                        | 100%        | 0/5                        | 0%       | 2.5/7                       | 36%         |
| Anti-OJ-negative       | 97/230                       | 42%         | 19/66                      | 29%      | 123/319                     | 39%      | 103.7/230                  | 45%         | N/A                        | N/A      | 116.3/319                   | 36%         |
| Anti-OJ-positive       | 1/5                          | 20%         | No OJ+                     | N/A      | 1/5                         | 20%      | 0.98/5                     | 20%         | N/A                        | N/A      | 0.7/5                       | 15%         |
| Anti-EJ-negative       | 97/233                       | 42%         | 19/64                      | 30%      | 123/320                     | 38%      | N/A                        | N/A         | 21.1/64                    | 33%      | 117.0/320                   | 37%         |
| Anti-EJ-positive       | No EJ+                       | N/A         | 0/2                        | 0%       | 0/2                         | 0%       | N/A                        | N/A         | 0/2                        | 0%       | 0/2                         | 0%          |
| Anti-KS-negative       | 96/233                       | 41%         | 19/66                      | 29%      | 122/322                     | 38%      | 102.5/233                  | 44%         | N/A                        | N/A      | 116.3/322                   | 36%         |
| Anti-KS-positive       | 2/3                          | 67%         | No KS+                     | N/A      | 2/3                         | 67%      | 2.3/3                      | 78%         | N/A                        | N/A      | 2.1/3                       | 71%         |
| Anti-Mi-2-negative     | 104/247                      | 42%         | 20/67                      | 30%      | 130/336                     | 39%      | 114.4/247                  | 46%         | 23.3/67                    | 35%      | 129.3/336                   | 38%         |
| Anti-Mi-2-positive     | 4/14                         | 29%         | 1/4                        | 25%      | 7/20                        | 35%      | 3.1/14                     | 22%         | 1.3/4                      | 33%      | 5.7/20                      | 29%         |
| Anti-MJ-negative       | 93/222                       | 42%         | 19/65                      | 29%      | 120/311                     | 39%      | 98.4/222                   | 44%         | 21.3/65                    | 33%      | 115.4/311                   | 37%         |
| Anti-MJ-positive       | 5/15                         | 33%         | 0/1                        | 0%       | 5/16                        | 31%      | 5.9/15                     | 39%         | 0/1                        | 0%       | 4.9/16                      | 31%         |
| Anti-SRP-negative      | 102/248                      | 41%         | 17/61                      | 28%      | 127/332                     | 38%      | 110.6/248                  | 45%         | 18.7/61                    | 31%      | 123.9/332                   | 37%         |
| Anti-SRP-positive      | 6/13                         | 46%         | 4/10                       | 40%      | 10/24                       | 42%      | 5.6/13                     | 43%         | 5.3/10                     | 53%      | 10.1/24                     | 42%         |
| Anti-p155/140-negative | 90/206                       | 44%         | 19/63                      | 30%      | 115/290                     | 40%      | 96.2/206                   | 47%         | 20.9/63                    | 33%      | 111.6/290                   | 38%         |
| Anti-p155/140-positive | 7/29                         | 24%         | 0/3                        | 0%       | 9/35                        | 26%      | 6.9/29                     | 24%         | 0/3                        | 0%       | 7.7/35                      | 22%         |

|                      |         |     |        |     |         |     |           |     |         |     |           |     |
|----------------------|---------|-----|--------|-----|---------|-----|-----------|-----|---------|-----|-----------|-----|
| MAA-negative         | 87/197  | 44% | 16/40  | 40% | 110/252 | 44% | 92.3/197  | 47% | 18.1/40 | 45% | 106.3/252 | 42% |
| MAA-positive         | 22/65   | 34% | 5/31   | 16% | 28/105  | 27% | 24.8/65   | 38% | 6.5/31  | 21% | 30.3/105  | 29% |
| Anti-PM/Scl-negative | 105/248 | 42% | 21/70  | 30% | 134/341 | 39% | 113.1/248 | 46% | 24.5/70 | 35% | 131.2/341 | 38% |
| Anti-PM/Scl-positive | 3/13    | 23% | 0/1    | 0%  | 3/15    | 20% | 3.3/13    | 25% | 0/1     | 0%  | 2.8/15    | 18% |
| Anti-KU-negative     | 98/235  | 42% | 19/65  | 29% | 124/322 | 39% | 104.4/235 | 44% | 21.3/65 | 33% | 117.9/322 | 37% |
| Anti-KU-positive     | 0/1     | 0%  | 0/1    | 0%  | 0/3     | 0%  | 0/1       | 0%  | 0/1     | 0%  | 0/3       | 0%  |
| Anti-U1RNP-negative  | 102/242 | 42% | 20/59  | 34% | 130/324 | 40% | 109.0/242 | 45% | 23.1/59 | 39% | 125.9/324 | 39% |
| Anti-U1RNP-positive  | 7/20    | 35% | 1/12   | 8%  | 8/33    | 24% | 8.4/20    | 42% | 1.3/12  | 11% | 9.0/33    | 27% |
| Anti-U2RNP-negative  | 83/201  | 41% | 14/56  | 25% | 102/274 | 37% | 88.7/201  | 44% | N/A     | N/A | 90.9/274  | 33% |
| Anti-U2RNP-positive  | 1/4     | 25% | No U2+ | N/A | 1/4     | 25% | 1.1/4     | 29% | N/A     | N/A | 0.8/4     | 20% |
| Anti-SSA/Ro-negative | 96/232  | 41% | 18/49  | 37% | 121/299 | 40% | 101.0/232 | 44% | 21.1/49 | 43% | 117.9/299 | 39% |
| Anti-SSA/Ro-positive | 13/30   | 43% | 3/22   | 14% | 17/58   | 29% | 10.3/30   | 34% | 3.8/22  | 17% | 18.7/58   | 32% |
| Anti-SSB/La-negative | 71/161  | 44% | 17/49  | 35% | 94/228  | 41% | 76.6/161  | 48% | 20.6/49 | 42% | 91.0/228  | 40% |
| Anti-SSB/La-positive | 4/8     | 50% | 0/4    | 0%  | 4/13    | 31% | 4.2/8     | 52% | 0/4     | 0%  | 3.7/13    | 29% |
| Anti-Smith-negative  | 107/257 | 42% | 18/65  | 28% | 133/346 | 38% | 114.6/257 | 45% | 21.4/65 | 33% | 128.8/346 | 37% |
| Anti-Smith-positive  | 1/4     | 25% | 1/3    | 33% | 2/7     | 29% | 1.4/4     | 34% | 1.5/3   | 50% | 2.6/7     | 37% |

Smoking frequency is adjusted by age at the time of evaluation, gender and race when appropriate. Each color pairing represents the two columns of a single 2x2 contingency table and percentage presents frequency of ever-smokers in each group. ILD= interstitial lung disease; MSA= myositis-specific autoantibodies; ASA= anti-synthetase autoantibodies; N/A= not applicable.
