# Supplementary material
Source: PubMed Central journal article supplement (PMC6133760)
Supplement: NIHMS963528-supplement-4.pdf [file NIHMS963528-supplement-4.pdf]

**Supplementary Table 2.** Unadjusted logistic regression analyses of risks of different clinical and serologic features in patients with polymyositis and dermatomyositis based on cigarette smoking history

| Outcome                                            | Total population<br>(n=465) |         | Caucasians<br>(n=330) |         | African-Americans<br>(n=99) |         |
|----------------------------------------------------|-----------------------------|---------|-----------------------|---------|-----------------------------|---------|
|                                                    | OR (95% CI)                 | P-value | OR (95% CI)           | P-value | OR (95% CI)                 | P-value |
| <b>Ever-smokers vs. never-smoker</b>               |                             |         |                       |         |                             |         |
| <b>Diagnosis, Polymyositis vs. dermatomyositis</b> | 2.18 (1.47 – 3.23)          | <0.001  | 2.38 (1.51 – 3.75)    | <0.001  | 2.35 (0.79 – 6.95)          | 0.12    |
| <b>Interstitial lung disease</b>                   | 1.56 (1.05 – 2.31)          | 0.027   | 1.77 (1.10 – 2.85)    | 0.018   | 1.04 (0.43 – 2.52)          | 0.93    |
| <b>Anti-synthetase autoantibodies</b>              | 1.47 (0.93 – 2.31)          | 0.095   | 1.69 (1.002 – 2.86)   | 0.049   | 0.82 (0.28 – 2.38)          | 0.71    |
| <b>Anti-Jo-1 autoantibodies</b>                    | 1.70 (1.05 – 2.77)          | 0.031   | 1.72 (0.99 – 3.01)    | 0.054   | 1.42 (0.44 – 4.52)          | 0.55    |
| <b>Anti-p155/140 autoantibodies</b>                | 0.53 (0.24 – 1.16)          | 0.113   | 0.41 (0.17 – 1.003)   | 0.051   | N/A                         | N/A     |
| <b>Cigarette smoking, pack-years</b>               |                             |         |                       |         |                             |         |
| <b>Diagnosis, Polymyositis vs. dermatomyositis</b> | 1.02 (1.006 – 1.04)         | 0.007   | 1.02 (1.005 – 1.04)   | 0.010   | 1.04 (0.98 – 1.10)          | 0.19    |
| <b>Interstitial lung disease</b>                   | 1.02 (1.006 – 1.03)         | 0.005   | 1.02 (1.005 – 1.03)   | 0.009   | 1.03 (0.99 – 1.08)          | 0.11    |
| <b>Anti-synthetase autoantibodies</b>              | 1.007 (0.99 – 1.02)         | 0.29    | 1.007 (0.99 – 1.02)   | 0.31    | 1.006 (0.97 – 1.05)         | 0.78    |
| <b>Anti-Jo-1 autoantibodies</b>                    | 1.01 (0.999 – 1.03)         | 0.062   | 1.01 (0.997 – 1.03)   | 0.11    | 1.02 (0.98 – 1.06)          | 0.33    |
| <b>Anti-p155/140 autoantibodies</b>                | 0.94 (0.88 – 1.001)         | 0.053   | 0.94 (0.88 – 1.002)   | 0.059   | N/A                         | N/A     |

N/A= not applicable. There were only three African-American patients with anti-p155/140 autoantibodies and none of them had a positive ever-smoking history.
