# Supplementary material
Source: PubMed Central journal article supplement (PMC6133760)
Supplement: NIHMS963528-supplement-5.pdf [file NIHMS963528-supplement-5.pdf]

**Supplementary Table 3.** Adjusted logistic regression analyses of risks of different clinical and serologic features in patients with polymyositis and dermatomyositis based on smoking status

| Outcome                              | Total population<br>(n=465) |         | Caucasians<br>(n=330) |         | African-Americans<br>(n=99) |         |
|--------------------------------------|-----------------------------|---------|-----------------------|---------|-----------------------------|---------|
|                                      | OR (95% CI)                 | P-value | OR (95% CI)           | P-value | OR (95% CI)                 | P-value |
| <b>Ever-smokers vs. never-smoker</b> |                             |         |                       |         |                             |         |
| Interstitial lung disease            | 1.41 (0.93 – 2.15)          | 0.11    | 1.48 (0.90 – 2.43)    | 0.13    | 0.96 (0.38 – 2.43)          | 0.93    |
| Anti-synthetase autoantibodies       | 1.42 (0.87 – 2.30)          | 0.16    | 1.68 (0.96 – 2.95)    | 0.069   | 0.72 (0.22 – 2.35)          | 0.59    |
| Anti-Jo-1 autoantibodies             | 1.43 (0.85 – 2.40)          | 0.18    | 1.61 (0.88 – 2.93)    | 0.12    | 0.80 (0.21 – 1.06)          | 0.66    |
| Anti-p155/140 autoantibodies         | 0.58 (0.24 – 1.40)          | 0.23    | 0.46 (0.17 – 1.23)    | 0.12    | N/A                         | N/A     |
| <b>Cigarette smoking, pack-years</b> |                             |         |                       |         |                             |         |
| Interstitial lung disease            | 1.02 (1.002 – 1.03)         | 0.019   | 1.01 (0.999 – 1.03)   | 0.066   | 1.04 (0.99 – 1.08)          | 0.12    |
| Anti-synthetase autoantibodies       | 1.01 (0.99 – 1.02)          | 0.39    | 1.01 (0.99 – 1.02)    | 0.31    | 1.002 (0.96 – 1.03)         | 0.93    |
| Anti-Jo-1 autoantibodies             | 1.01 (0.99 – 1.02)          | 0.25    | 1.01 (0.99 – 1.03)    | 0.14    | 0.99 (0.94 – 1.04)          | 0.76    |
| Anti-p155/140 autoantibodies         | 0.94 (0.89 – 1.00)          | 0.051   | 0.94 (0.88 – 1.00)    | 0.061   | N/A                         | N/A     |

Analyses are adjusted for age, gender, diagnosis and race as appropriate. N/A= not applicable. There were only three African-American patients with anti-p155/140 autoantibodies and none of them had a positive ever-smoking history.
