# Supplementary material
Source: PubMed Central journal article supplement (PMC6133760)
Supplement: NIHMS963528-supplement-6.pdf [file NIHMS963528-supplement-6.pdf]

**Supplementary Table 4.** Adjusted logistic regression analyses assessing risks of different clinical and serologic features by ever-smoking and the presence of HLA-DRB1\*03:01 alleles in African-American patients with polymyositis and dermatomyositis

| <b>Anti-Jo-1 autoantibodies</b>                    |                       |                               |                               |                     |         |
|----------------------------------------------------|-----------------------|-------------------------------|-------------------------------|---------------------|---------|
| Ever smoking                                       | HLA-DRB1*03:01 allele | Anti-Jo-1 negative, N (%)     | Anti-Jo-1 positive, N (%)     | Adjusted OR (95%CI) | P value |
| Negative                                           | Negative              | 24 (80%)                      | 6 (20%)                       | 1.00                | -       |
| Positive                                           | Negative              | 8 (73%)                       | 3 (27%)                       | 0.92 (0.15 – 5.66)  | 0.93    |
| Negative                                           | Positive              | 3 (60%)                       | 2 (40%)                       | 2.5 (0.28 – 22.4)   | 0.41    |
| Positive                                           | Positive              | 2 (67%)                       | 1 (33%)                       | 0.37 (0.01 – 10.41) | 0.56    |
| <b>Anti-synthetase autoantibodies (ASA)</b>        |                       |                               |                               |                     |         |
| Ever smoking                                       | HLA-DRB1*03:01 allele | ASA negative, N (%)           | ASA positive, N (%)           | Adjusted OR (95%CI) | P value |
| Negative                                           | Negative              | 16 (53%)                      | 14 (47%)                      | 1.00                | -       |
| Positive                                           | Negative              | 8 (73%)                       | 3 (27%)                       | 0.31 (0.06 – 1.63)  | 0.17    |
| Negative                                           | Positive              | 3 (60%)                       | 2 (40%)                       | 1.65 (0.23 – 11.79) | 0.62    |
| Positive                                           | Positive              | 2 (67%)                       | 1 (33%)                       | 0.33 (0.02 – 5.62)  | 0.44    |
| <b>Interstitial lung disease (ILD)</b>             |                       |                               |                               |                     |         |
| Ever smoking                                       | HLA-DRB1*03:01 allele | ILD negative, N (%)           | ILD positive, N (%)           | Adjusted OR (95%CI) | P value |
| Negative                                           | Negative              | 22 (52%)                      | 20 (48%)                      | 1.00                | -       |
| Positive                                           | Negative              | 8 (57%)                       | 6 (43%)                       | 0.74 (0.21 – 2.57)  | 0.63    |
| Negative                                           | Positive              | 2 (22%)                       | 7 (78%)                       | 3.88 (0.71 – 21.29) | 0.12    |
| Positive                                           | Positive              | 1 (20%)                       | 4 (80%)                       | 3.16 (0.30 – 33.55) | 0.34    |
| <b>Diagnosis, polymyositis vs. dermatomyositis</b> |                       |                               |                               |                     |         |
| Ever smoking                                       | HLA-DRB1*03:01 allele | Dermatomyositis, N (%)        | Polymyositis, N (%)           | Adjusted OR (95%CI) | P value |
| Negative                                           | Negative              | 18 (42%)                      | 25 (58%)                      | 1.00                | -       |
| Positive                                           | Negative              | 2 (13%)                       | 13 (87%)                      | 5.18 (0.99 – 27.09) | 0.051   |
| Negative                                           | Positive              | 1 (11%)                       | 8 (89%)                       | 6.61 (0.73 – 59.52) | 0.092   |
| Positive                                           | Positive              | 1 (20%)                       | 4 (80%)                       | 3.17 (0.29 – 35.01) | 0.35    |
| <b>Anti-p155/140 autoantibodies</b>                |                       |                               |                               |                     |         |
| Ever smoking                                       | HLA-DRB1*03:01 allele | Anti-p155/140 negative, N (%) | Anti-p155/140 positive, N (%) | Adjusted OR (95%CI) | P value |
| Negative                                           | Negative              | 26 (93%)                      | 2 (7%)                        | N/A                 | N/A     |
| Positive                                           | Negative              | 10 (100%)                     | 0 (0%)                        | N/A                 | N/A     |
| Negative                                           | Positive              | 4 (100%)                      | 0 (0%)                        | N/A                 | N/A     |
| Positive                                           | Positive              | 2 (100%)                      | 0 (0%)                        | N/A                 | N/A     |

Odds ratios are adjusted for the impact of age and gender. N/A= not applicable.
